# Supplementary material for: The GALNT14 Genotype Predicts Postoperative Outcome of Pancreatic Ductal Adenocarcinoma
Source: PubMed Central journal article supplement (PMC6947583; doi:10.3390/jcm8122225), 2019-12-16
Supplement: jcm-08-02225-s001.pdf [file jcm-08-02225-s001.pdf]

## Supplementary method

Immunohistochemical (IHC) staining

The assay was conducted as previously described. [1] The polyclonal rabbit antibody against GALNT14 (Proteintech, 16939-AP) was used in the dilution of 1:200.

## Reference

Liang, K.-H.; Lin, C.-L.; Chen, S.-F.; Chiu, C.-W.; Yang, P.-C.; Chang, M.-L.; Lin, C.-C.; Sung, K.-F.; Yeh, C.; Hung, C.-F.; Chien, R.-N.; Yeh, C.-T. *GALNT14* genotype effectively predicts the therapeutic response in unresectable hepatocellular carcinoma treated with transcatheter arterial chemoembolization. *Pharmacogenomics* 2016 17, 353-366.

Supplemental Figure legend

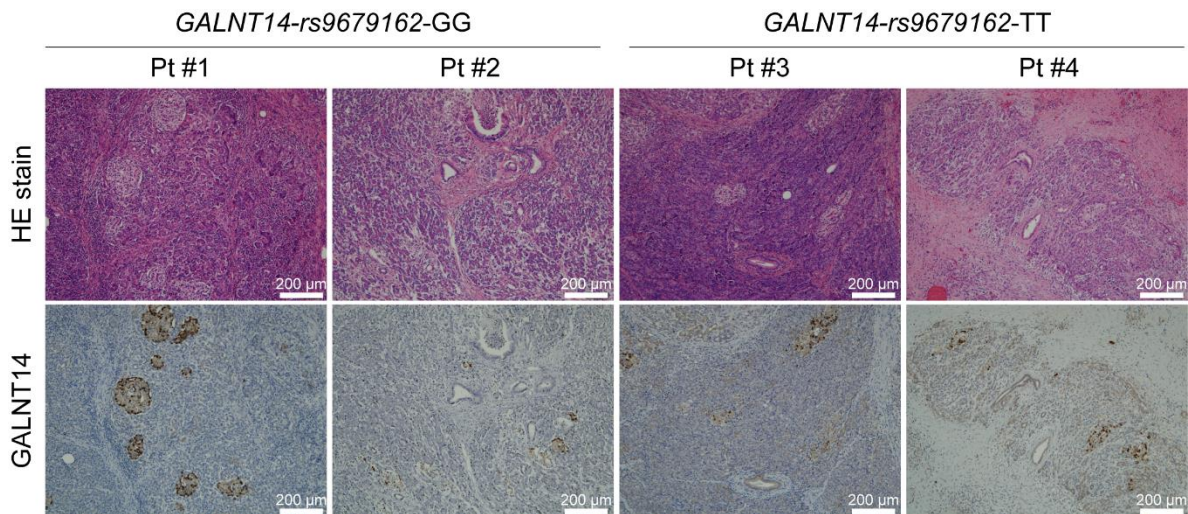

**Figure S1.** The expression of GALNT14 in pancreatic cancer of patients with TT or GG genotypes at rs9679162. The representative images of IHC staining showed the level of GALNT14 in PDA patient-derived tissues. Among them, patients with TT-type was observed had higher expression of GALNT14 while those with GG-type exhibited lower level of it in cancerous cells, however it was opposite in the islet cells. Totally 20 patients, 10 were TT while 10 were GG genotype at rs9679162, were included in this assay. The scale bar was as indicated on the images.

**Supplementary Table 1.** Sensitivity analysis of subgroups.

| Clinicopathological variable    | HR   | 95%CI | <i>p</i> -value |       |
|---------------------------------|------|-------|-----------------|-------|
| Age ≤ 65 y                      | 0.23 | 0.07  | 0.79            | 0.019 |
| Age > 65 y                      | 0.53 | 0.2   | 1.43            | 0.208 |
| Male                            | 0.17 | 0.05  | 0.57            | 0.004 |
| Female                          | 0.74 | 0.25  | 2.17            | 0.578 |
| CEA ≤ 5 ng/mL                   | 0.3  | 0.1   | 0.89            | 0.030 |
| CEA > 5 ng/mL                   | 0.63 | 0.18  | 2.24            | 0.479 |
| CA19-9 ≤ 37 IU/mL               | 0.91 | 0.25  | 3.39            | 0.890 |
| CA19-9 > 37 IU/mL               | 0.24 | 0.08  | 0.71            | 0.010 |
| T-Bilirubin ≤ 1.4 mg/dL         | 0.57 | 0.16  | 2.03            | 0.390 |
| T-Bilirubin > 1.4 mg/dL         | 0.19 | 0.06  | 0.65            | 0.008 |
| Tumor at head                   | 0.34 | 0.14  | 0.83            | 0.019 |
| Tumor at body & tail            | 0.43 | 0.1   | 1.91            | 0.266 |
| Tumor size ≤ 10 cm <sup>3</sup> | 0.17 | 0.05  | 0.58            | 0.005 |

|                                 |      |      |       |       |
|---------------------------------|------|------|-------|-------|
| Tumor size > 10 cm <sup>3</sup> | 0.75 | 0.26 | 2.16  | 0.591 |
| Negative margin                 | 0.33 | 0.12 | 0.91  | 0.031 |
| Positive margin                 | 0.37 | 0.09 | 1.62  | 0.189 |
| Well & moderate differentiation | 0.26 | 0.1  | 0.69  | 0.007 |
| Poor differentiation            | 0.53 | 0.11 | 2.52  | 0.421 |
| pT1-3                           | 0.34 | 0.16 | 0.75  | 0.008 |
| pT4                             | -    | -    | -     | -     |
| N0                              | 0.17 | 0.04 | 0.75  | 0.020 |
| N1-2                            | 0.53 | 0.21 | 1.31  | 0.168 |
| M0                              | 0.28 | 0.11 | 0.69  | 0.006 |
| M1                              | 0.47 | 0.1  | 2.31  | 0.351 |
| Peritoneal invasion: absent     | 0.3  | 0.13 | 0.69  | 0.005 |
| Peritoneal invasion: present    | 1    | 0.06 | 15.99 | 1.000 |
| Vascular invasion: absent       | 0.35 | 0.15 | 0.81  | 0.014 |
| Vascular invasion: present      | 0.04 | 0    | 38.86 | 0.349 |
| Lymphatic invasion: absent      | 0.19 | 0.04 | 0.87  | 0.032 |
| Lymphatic invasion: present     | 0.47 | 0.19 | 1.15  | 0.099 |
| Perineural invasion: absent     | 0.58 | 0.13 | 2.6   | 0.474 |
| Perineural invasion: present    | 0.33 | 0.13 | 0.82  | 0.017 |
| No adjuvant chemotherapy        | 0.51 | 0.2  | 1.3   | 0.158 |
| Adjuvant chemotherapy           | 0.18 | 0.04 | 0.85  | 0.030 |
| All patients                    | 0.34 | 0.16 | 0.75  | 0.007 |

Abbreviations: CEA = carcinoembryonic antigen, CA19-9 = carbohydrate antigen 19-9, T-Bilirubin = total bilirubin, HR = hazard ratio, CI = confidence interval.
